# Supplementary material for: Estimation of Secondary PM 2.5 in China and the United States using a Multi-Tracer Approach
Source: Copernicus journal article supplement (doi:10.5194/acp-2021-683), 2021-10-05
Supplement: Supplementary file [file acp-2021-683-AC2-supplement.pdf]

1 **Response to RC#2:**

2 Dear Editor and anonymous referee #1:

3 We greatly appreciate your consideration and the reviewer's constructive  
4 comments on the manuscript of "Estimation of Secondary PM<sub>2.5</sub> in China and the  
5 United States using a Multi-Tracer Approach" (acp-2021-683). We have carefully  
6 revised the manuscript to address all the comments as described below. Reviewer  
7 comments are shown in blue. Our responses are shown in black. The revised texts are  
8 shown in italics.

9

10 The manuscript demonstrates the multi-tracer estimation algorithm (MTEA), to  
11 identify the primary and secondary components from routine observation of PM<sub>2.5</sub> and  
12 validates the method by comparing the long-term and short-term measurements of  
13 aerosol chemical composition in China and a network from the United States. This  
14 method provides a useful and uncomplicated way to estimate primary and secondary  
15 PM, using routine observation species and emission inventories. This manuscript aims  
16 to address important questions quantifying primary and secondary aerosols and is  
17 within the scope of ACP.

18 However, regarding the method itself, the method should be carefully introduced  
19 with more details. The validation part is a bit weak and should be strengthened in the  
20 next version. It is vital because only with good validation can one trust the result from  
21 the model. In addition, in the result and discussion part, the discussion is superficial,  
22 which needs to be improved in depth, and backed up by more scientific evidence and/or  
23 publications.

24 As a conclusion, the manuscript provides a novel algorithm in primary and  
25 secondary particle concentrations, however, the manuscript is not carefully written from  
26 the perspective of science and scientific writing, with certain degree of improvement  
27 for publication in ACP. Therefore, this manuscript needs a major revision in terms of  
28 major context and English language.

29           **Response:** We thank the reviewer for the comments. According to the reviewer's  
30 helpful and insightful comments, we have revised our manuscript and the point-by-  
31 point responses to the specific comments were given subsequently. We sincerely hope  
32 these revisions are able to address the reviewer's concerns.

33

34           1. Introduction: the introduction is poorly written and need to be re-write. If I were  
35 you, I would write the introduction based on this outline: 1) introduction of atmospheric  
36 aerosols, including sources, type, chemical composition and impacts on air quality,  
37 human health and climate, 2) summaries other studies, you must state what has been  
38 achieved and what is the current challenging, 3) what is your paper about, how this  
39 paper can narrow the gap.

40           In the current version, the point 1) is addressed, but should be introduced in  
41 smoother way. The author is trying to address the point 2), but the studies mentioned in  
42 the paragraph 3 in page 3 look not very relevant. For example, the author summarizes  
43 the online and offline studies, which is good, and people can see the drawbacks of field  
44 and lab measurement to study the PPM and SPM, so the next paragraph should state to  
45 overcome these drawbacks, people use model to study the PPM and SPM, and should  
46 also state what these model studies have achieved and/or the drawbacks of these method.  
47 Finally, this paragraph can lead the final paragraph in the introduction, namely,  
48 introduce this study and how this study advances the model studies on PPM and SPM  
49 estimation.

50           **Response:** Thanks for your constructive suggestions and rigorous attitude to  
51 scientific research. We do think it is necessary and important to rephrase the structure  
52 of this part. Following the suggestion, we have rewritten the introduction section. The  
53 detailed description of this part has been corrected in the revised manuscript as follows.

54           ***Revision in Section 1:***

55           *Fine particulate matter ( $PM_{2.5}$ , aerodynamic diameter less than  $2.5 \mu m$ ) can be*  
56 *categorized into primary and secondary  $PM_{2.5}$  according to its formation processes.*

57 Primary  $PM_{2.5}$  (PPM), including primary organic aerosol (POA), elemental carbon  
58 (EC), sea salt and mineral dust, is the product of direct emission from combustion of  
59 fossil/biomass fuel, dust blowing and sea spray. Secondary  $PM_{2.5}$  (SPM) mainly  
60 generates from the further oxidation of gaseous precursors emitted by anthropogenic  
61 and biogenic activities (Zhu et al., 2018; Wang et al., 2019). SPM consists of secondary  
62 organic aerosol (SOA) and secondary inorganic aerosol (SIA, including sulfate, nitrate  
63 and ammonium). The primary and secondary components of  $PM_{2.5}$  have different  
64 environmental impacts on air quality, human health and climate change. For example,  
65 as a typical PPM, EC can severely reduce atmospheric visibility and greatly influence  
66 weather and climate due to its strong absorption of solar radiation (Bond et al., 2013;  
67 IPCC, 2013; Mao et al., 2017). Sulfate, a critical hygroscopic component of secondary  
68  $PM_{2.5}$  (SPM), can be fast formed under high relative humidity conditions and further  
69 leads to grievous air pollution (Cheng et al., 2016; Guo et al., 2014; Quan et al., 2015).  
70 Furthermore, the sulfate and other hygroscopic  $PM_{2.5}$  have considerable influences on  
71 climate change mostly by changing cloud properties (Leng et al., 2013; von  
72 Schneidemesser et al., 2015). In addition, different  $PM_{2.5}$  components also have various  
73 deleterious impacts on human health for their toxicities (Hu et al., 2017; Khan et al.,  
74 2016; Maji et al., 2018).

75 To understand the severe  $PM_{2.5}$  pollution characteristics in China over the past  
76 several years (An et al., 2019; Song et al., 2017; Yang et al., 2016), many observational  
77 studies have been conducted on  $PM_{2.5}$  components. The basic methods of these studies  
78 are offline laboratory analysis and online instrument measurement such as aerosol  
79 mass spectrometer (AMS). The observational studies are crucial to exactly identify the  
80 aerosol chemical compositions. For offline approach, it is the most widely used method  
81 (Ming et al., 2017; Tang et al., 2017; Tao et al., 2017; Dai et al., 2018; Gao et al., 2018;  
82 Liu et al., 2018a; Wang et al., 2018; Zhang et al., 2018; Xu et al., 2019; Yu et al., 2019)  
83 and is successfully applied to investigate the inter-annual variations of different aerosol  
84 chemical species (Ding et al., 2019; Liu et al., 2018b). In terms of online approach,  
85 AMS is the state-of-the-art method for analyzing different chemical species with high  
86 time resolution, which has great application value in diagnosing the causes of haze  
87 events in China over the past decade (Huang et al., 2014; Quan et al., 2015; Guo et al.,  
88 2014; Yang et al., 2021; Gao et al., 2021; Hu et al., 2021; Zhang et al., 2022).

89 Nevertheless, both the online and offline measurements require a high level of

90 *manpower and economic cost, and for this reason, these methods are expensive and*  
91 *rarely applied in large-scale regions or long-term periods.*

92 *Chemical transport model (CTM) is another useful tool to identify the composition*  
93 *characteristics of PM<sub>2.5</sub>. The simulation predicted by CTM is featured as high spatio-*  
94 *temporal resolution (Geng et al., 2021). Meanwhile, it also provides vertical profiles of*  
95 *diverse chemical species (Ding et al., 2016). However, the CTM results are largely*  
96 *dependent on external inputs such as emission inventories, boundary conditions, initial*  
97 *conditions, etc. The internal parameterizations of itself significantly influence the final*  
98 *model results as well (Huang et al., 2021), which leads to uncertainty in the simulated*  
99 *PM<sub>2.5</sub> and its composition. In addition, the burden of high requirement in computational*  
100 *cost and storage also makes CTM hard to universally use.*

101 *In this study, we develop a novel method, Multi-Tracer Estimation Algorithm*  
102 *(MTEA), with the aim of distinguishing the primary and secondary compositions of*  
103 *PM<sub>2.5</sub> from routine observation of PM<sub>2.5</sub> concentration. Different from traditional CTMs,*  
104 *MTEA proposed by this study is based on statistical assumption and works in a more*  
105 *convenient way. This algorithm and its application are tested in China and the United*  
106 *States. In Section 2, we introduce the structure and principle of MTEA. In Section 3, we*  
107 *evaluate the MTEA results comparing with three PM<sub>2.5</sub> composition data sets, (1) short-*  
108 *term measurements in 16 cities in China from 2012 to 2016 reported by previous studies,*  
109 *(2) continuous long-term measurements in Beijing and Shanghai from 2014 to 2018,*  
110 *and (3) IMPROVE network in the United States during 2014 and 2018. Additionally,*  
111 *we also compare MTEA model with one of the most advanced datasets from CTM in*  
112 *China. Subsequently, in Section 4 we investigate the spatio-temporal characteristics of*  
113 *PPM and SPM concentrations in China, explain the unexpected haze event in several*  
114 *cities of China during the COVID-19 lockdown and discuss the complicated correlation*  
115 *between PM and O<sub>3</sub>. This study is different from previous works as follows: (1) we*  
116 *develop an efficient approach to explore PPM and SPM with low economy-/technique-*  
117 *cost and computation burden, (2) we apply this approach to observation data from the*  
118 *MEE network, offering an unprecedented opportunity to quantify the PM<sub>2.5</sub> components*  
119 *on a large space and time scale.*

120

121 2. Methodology: the methodology part is written in a reasonable logic, but the  
122 author needs to pay more attention to specify the technical details, e.g., the definition  
123 of some terms.

124 **Response:** Thanks for your kind reminding and rigorous attitude to scientific  
125 research. We have carefully checked all technical details and revised them for a more  
126 proper expression in Section 2.

127 **Revision in Section 2:**

128 *The multi-tracer (marked as X) is defined to represent multiple primary*  
129 *contributions to  $PM_{2.5}$ , mainly resulting from incomplete combustion of carbonaceous*  
130 *material and flying dust.*

131 *We select the typical combustion product CO as one tracer to represent the*  
132 *combustion process, and the particles in coarse mode ( $PM_{coarse}$ , marked as PMC,  $PMC$*   
133 *=  $PM_{10} - PM_{2.5}$ ) as the other tracer to track flying dust.*

134 *However, this investigative coefficient for quantifying primary sulfate and nitrate*  
135 *emissions might be relatively higher compared to empirical coefficients (0.01-0.05)*  
136 *used in previous simulation studies.*

137 *They estimated primary and secondary organic carbon (marked as POC and SOC)*  
138 *concentrations by adopting a proper POC/EC ratio when SOC correlated with EC*  
139 *worst.*

140

141 3. Model validation: this part straightforwardly delivers the good validation result  
142 between model and observation. Good correlation is shown in this part, suggesting good  
143 model performance. However, this part also requires more interpretation on the model's  
144 over/underestimation behavior compared to observation, which is now absent. Ideally,  
145 the author should focus most on this part, because only when the model is reasonable  
146 validated can we trust the result and make the further interpretation on the result.

147 Therefore, from my own perspective, the author should strengthen this part.

148 **Response:** Thanks for your conducive comment. We have enhanced the discussion  
149 in the model evaluation part as you suggested.

150 **Revision in Section 3.1.2:**

151 *However, we find that there are still a few discrepancies between the estimated and*  
152 *observation-based results. For example, we overestimated the secondary proportions*  
153 *of PM<sub>2.5</sub> in cities such as Haikou, Lanzhou and Lhasa. Though all of them show a*  
154 *considerable overestimation of over 20%, the causes lead to this kind of bias may be*  
155 *quite different. In coastal city Haikou, we may attribute this discrepancy between MTEA*  
156 *and observation to the neglect of the contribution of sea salt aerosols. The PM<sub>2.5</sub> offline*  
157 *measurements in 2015 exhibited that the contribution of sea salt aerosols to ambient*  
158 *PM<sub>2.5</sub> mass concentration in Haikou is 3.6-8.3% (Liu et al., 2017). Secondly, the*  
159 *overestimation phenomenon in Lanzhou, which is a typical inland city located in*  
160 *northwestern China, can be explained by overlooking the contribution of natural dust*  
161 *to PM<sub>2.5</sub> speciation. Generally, both sea salt and natural dust are categorized into non-*  
162 *anthropogenic processes, and are not accounted for by anthropogenic emission*  
163 *inventory, resulting in the underestimation of representing primary process intensity.*  
164 *Finally, for Lhasa, the observation-based results which are derived from too few*  
165 *samplers also pose controversial comparison against MTEA model.*

166

167 4. Result and discussion: this part also very straightforwardly and logically reports  
168 the results. However, the interpretation of results should be more comprehensive and  
169 backed up by previous studies and/or solid evidence, which is absent now and needs to  
170 be added. In addition, the discussion of the result is very superficial, lacking depths,  
171 which should also be improved.

172 **Response:** Thanks for your conducive comments and rigorous attitude to scientific  
173 research. To enrich our discussion as the reviewer mentioned, we have carefully revised  
174 the related texts in the result part.

175 **Revision in Section 4:**

176 *We used the MTEA approach and the MEE observation data to estimate PPM and*  
177 *SPM concentrations in China for the period of 2014-2018. The observations during*  
178 *severe haze events (top 10% CO and PMC polluted days) were excluded to avoid the*  
179 *influence of unfavorable meteorological conditions and extreme high primary emission*  
180 *cases. Unfavorable meteorological conditions are major causes for haze events. PPM*  
181 *under these unfavored meteorological conditions may have considerable high co-linear*  
182 *relationship with total PM<sub>2.5</sub>. The concentration of SPM from complicated formation*  
183 *pathways is then underestimated. Therefore, we excluded these polluted days to focus*  
184 *more attention on general characteristics of PPM and SPM concentration.*

185 **Revision in Section 4.3:**

186 *To explore this unexpected air pollution, we find that the enhanced secondary*  
187 *pollution could be the major factor, which even offset the reduction of primary*  
188 *emissions in the BTH region during the lockdown. With the help of MTEA, we tracked*  
189 *variations of the secondary proportions of PM<sub>2.5</sub> in East China before and during the*  
190 *COVID-19 lockdown (Fig. 9 d-f). The specific emission reductions owing to the*  
191 *national lockdown were derived from Huang et al. (2020). Based on the bottom-up*  
192 *dynamic estimation, provincial emissions of CO, NO<sub>x</sub>, SO<sub>2</sub>, VOC, PM<sub>2.5</sub>, BC and OC*  
193 *decreased by 13-41%, 29-57%, 15-42%, 28-46%, 9-34%, 13-54%, and 3-42%,*  
194 *respectively during the lockdown period. The secondary proportions in the BTH region*  
195 *show an evident increase, at the level of 7%-34%, which highlights the importance of*  
196 *the secondary formation during the lockdown. Our result is consistent with recent*  
197 *observation and simulation studies (Chang et al., 2020; Huang et al., 2020; Le et al.,*  
198 *2020), which suggested that the reduced NO<sub>2</sub> resulted in O<sub>3</sub> enhancement, further*  
199 *increasing the AOC and facilitating the formation of secondary inorganic aerosols such*  
200 *as ammonium sulfate, ammonium nitrate. In addition, another cause of the air pollution*  
201 *is the unfavorable atmospheric diffusion conditions. CO, a nonreactive pollutant, was*  
202 *increased by 22% in Beijing during the lockdown even under considerable reduction*  
203 *on its emission.*

204 **Revision in Section 4.4:**

205 *A series of recent studies have focused on the correlation between PM<sub>2.5</sub> and O<sub>3</sub>,*  
206 *and many of them agreed that the correlation varies greatly in different regions of China.*  
207 *Specifically, the statistical correlation is stronger positive in southern cities compared*  
208 *to that in northern cities (Chu et al., 2020). Because of this significant difference, a*  
209 *question raises: is the difference mostly caused by PPM, or SPM, or both of them? To*  
210 *address this question, we compare the correlations between daily PPM, SPM and total*  
211 *PM<sub>2.5</sub> versus O<sub>3</sub> in Beijing-Tianjin-Hebei (BTH) and Yangtze River Delta (YRD) region*  
212 *during the study period, with the help of META approach. The O<sub>3</sub> diurnal formation*  
213 *regime can be destroyed because of the suppressed radiative condition under*  
214 *precipitation. The local O<sub>3</sub> concentration level is mainly dominated by background*  
215 *fields. Here we would like to focus our attention on the secondary formation*  
216 *relationship between daily PM<sub>2.5</sub> and O<sub>3</sub>. Therefore the cases when precipitation took*  
217 *place were removed to avoid the cleaning impacts of wet deposition on MDA8*  
218 *(maximum daily 8-h average) O<sub>3</sub> concentrations. Precipitation data is based on the*  
219 *ERA5 reanalysis database from the European Centre for Medium-Range Weather*  
220 *Forecasts (ECMWF, <https://www.ecmwf.int/>, last access, 1 August 2021).*

221 **Revision in Section 4.5:**

222 *Thirdly, current bottom-up emission inventories are generally outdated with a time*  
223 *lag of at least 1-2 years, mainly due to the lack of timely and accurate statistics.*  
224 *Consequently, the adjoint uncertainty in MTEA estimation is inevitable.*

225 *To evaluate the uncertainty, a comparison test was conducted by adjusting the*  
226 *apportioning coefficient (the  $a$  and  $b$  in Eq. 1) with a disturbance of  $\pm 0.1$ . Firstly, we*  
227 *decreased the value of  $a$  in each populous city by 0.1. Meanwhile, the coefficient  $b$*   
228 *increased by 0.1. This scenario indicates an overestimation in contribution of*  
229 *combustion-related process to primary PM<sub>2.5</sub> or underestimation in contribution of*  
230 *dust-related process. Secondly, we increased the value of  $a$  in each populous city by 0.1*  
231 *(decreased  $b$  by 0.1) for checking the opposite case. The results are presented in Table*



232 *S5 and point out that the estimated secondary proportions of PM<sub>2.5</sub> varied less than ±3%*  
233 *in most populous cities caused by the changes of the apportioning coefficient. This*  
234 *sensitivity experiment highlights that the apportioning coefficients depending on*  
235 *emissions has limited impacts on the final estimation results. Generally, the uncertainty*  
236 *of apportioning coefficient is one of two factors that directly affect the tracer X. The*  
237 *other one is the concentration of CO and PMC itself. Hence, we also conducted a*  
238 *similar test to check the impacts of tracer X on the model estimation by changing the*  
239 *tracer concentrations mentioned in Eq.1. Specifically, we (1) increased CO*  
240 *concentration by 10% as well as decreased PMC concentration by 10% and (2)*  
241 *decreased CO concentration by 10% as well as increased PMC concentration by 10%.*  
242 *Both sets of adjustment show changes within ±2% in the estimated secondary*  
243 *proportions of PM<sub>2.5</sub> in all cities except for Urumqi (Table S6). This phenomenon from*  
244 *the perspective of tracer concentration also supports that the impacts of the tracer X*  
245 *on the final model results are limited. In summary, we believe that the most*  
246 *determinative stuff for the final results of our model is the principle of the minimum*  
247 *correlation between PPM and SPM but not the tracer X which relies on emissions or*  
248 *concentrations.*

249

250 [5. Conclusion: it summarizes the significance of the study, but one or two](#)  
251 [paragraph need to be re-written, based on the revised context in Section 4.](#)

252 **Response:** Thank you for your comments and we have added the related texts to  
253 the manuscript.

254 **Revision in Section 5:**

255 *We also discussed the uncertainties of the MTEA method. MTEA may pose*  
256 *overestimation on the secondary fractions of PM<sub>2.5</sub> in those regions which are near to*  
257 *desert or sea by ~20% for failing taking natural dust into consideration. In addition,*  
258 *the sensitivity experiment through imposing reasonable disturbance on emissions and*  
259 *tracer concentrations also show the limited impacts on final estimation. Overall, the*

260 *most determinative stuff for our model estimate is the principle of the minimum*  
261 *correlation between PPM and SPM.*

262

## 263 **Reference**

264 Bond, T. C., Doherty, S. J., Fahey, D. W., Forster, P. M., Berntsen, T., DeAngelo, B. J.,  
265 Flanner, M. G., Ghan, S., Kärcher, B., Koch, D., Kinne, S., Kondo, Y., Quinn, P.  
266 K., Sarofim, M. C., Schultz, M. G., Schulz, M., Venkataraman, C., Zhang, H.,  
267 Zhang, S., Bellouin, N., Guttikunda, S. K., Hopke, P. K., Jacobson, M. Z., Kaiser,  
268 J. W., Klimont, Z., Lohmann, U., Schwarz, J. P., Shindell, D., Storelvmo, T.,  
269 Warren, S. G., and Zender, C. S.: Bounding the role of black carbon in the climate  
270 system: A scientific assessment, *J. Geophys. Res.* , 118, 5380-5552,  
271 10.1002/jgrd.50171, 2013.

272 Chang, Y., Huang, R. J., Ge, X., Huang, X., Hu, J., Duan, Y., Zou, Z., Liu, X., and  
273 Lehmann, M. F.: Puzzling Haze Events in China During the Coronavirus (COVID-  
274 19) Shutdown, *Geophys. Res. Lett.*, 47, 10.1029/2020gl088533, 2020.

275 Cheng, Y., Zheng, G., Wei, C., Mu, Q., Zheng, B., Wang, Z., Gao, M., Zhang, Q., He,  
276 K., Carmichael, G., Pöschl, U., and Su, H.: Reactive nitrogen chemistry in aerosol  
277 water as a source of sulfate during haze events in China, *Sci. Adv.*, 2, e1601530,  
278 10.1126/sciadv.1601530, 2016.

279 Chu, B., Ma, Q., Liu, J., Ma, J., Zhang, P., Chen, T., Feng, Q., Wang, C., Yang, N., Ma,  
280 H., Ma, J., Russell, A. G., and He, H.: Air Pollutant Correlations in China:  
281 Secondary Air Pollutant Responses to NO<sub>x</sub> and SO<sub>2</sub> Control, *Environmental*  
282 *Science & Technology Letters*, 7, 695-700, 10.1021/acs.estlett.0c00403, 2020.

283 Dai, Q., Bi, X., Liu, B., Li, L., Ding, J., Song, W., Bi, S., Schulze, B. C., Song, C., Wu,  
284 J., Zhang, Y., Feng, Y., and Hopke, P. K.: Chemical nature of PM<sub>2.5</sub> and PM<sub>10</sub> in  
285 Xian, China: Insights into primary emissions and secondary particle formation,  
286 *Environ. Pollut.*, 240, 155-166, 10.1016/j.envpol.2018.04.111, 2018.

287 Ding, A., Huang, X., Nie, W., Chi, X., Xu, Z., Zheng, L., Xu, Z., Xie, Y., Qi, X., Shen,  
288 Y., Sun, P., Wang, J., Wang, L., Sun, J., Yang, X.-Q., Qin, W., Zhang, X., Cheng,  
289 W., Liu, W., Pan, L., and Fu, C.: Significant reduction of PM<sub>2.5</sub> in eastern China  
290 due to regional-scale emission control: evidence from SORPES in 2011–2018,  
291 *Atmospheric Chemistry and Physics*, 19, 11791-11801, 10.5194/acp-19-11791-  
292 2019, 2019.

293 Ding, A. J., Huang, X., Nie, W., Sun, J. N., Kerminen, V. M., Petäjä, T., Su, H., Cheng,  
294 Y. F., Yang, X. Q., Wang, M. H., Chi, X. G., Wang, J. P., Virkkula, A., Guo, W. D.,  
295 Yuan, J., Wang, S. Y., Zhang, R. J., Wu, Y. F., Song, Y., Zhu, T., Zilitinkevich, S.,  
296 Kulmala, M., and Fu, C. B.: Enhanced haze pollution by black carbon in  
297 megacities in China, *Geophys. Res. Lett.*, 43, 2873-2879, 10.1002/2016gl067745,  
298 2016.

299 Gao, J., Wang, K., Wang, Y., Liu, S., Zhu, C., Hao, J., Liu, H., Hua, S., and Tian, H.:  
300 Temporal-spatial characteristics and source apportionment of PM<sub>2.5</sub> as well as its  
301 associated chemical species in the Beijing-Tianjin-Hebei region of China, *Environ.*  
302 *Pollut.*, 233, 714-724, 10.1016/j.envpol.2017.10.123, 2018.

303 Gao, J., Li, Y., Li, J., Shi, G., Liu, Z., Han, B., Tian, X., Wang, Y., Feng, Y., and Russell,  
304 A. G.: Impact of Formation Pathways on Secondary Inorganic Aerosol During  
305 Haze Pollution in Beijing: Quantitative Evidence From High-Resolution  
306 Observation and Modeling, *Geophys. Res. Lett.*, 48, 10.1029/2021gl095623, 2021.

307 Geng, G., Xiao, Q., Liu, S., Liu, X., Cheng, J., Zheng, Y., Xue, T., Tong, D., Zheng, B.,  
308 Peng, Y., Huang, X., He, K., and Zhang, Q.: Tracking Air Pollution in China: Near  
309 Real-Time PM<sub>2.5</sub> Retrievals from Multisource Data Fusion, *Environ. Sci.*  
310 *Technol.*, 55, 12106-12115, 10.1021/acs.est.1c01863, 2021.

311 Guo, S., Hu, M., Zamora, M. L., Peng, J., Shang, D., Zheng, J., Du, Z., Wu, Z., Shao,  
312 M., Zeng, L., Molina, M. J., and Zhang, R.: Elucidating severe urban haze  
313 formation in China, *Proc. Natl. Acad. Sci.*, 111, 17373-17378,  
314 10.1073/pnas.1419604111, 2014.

315 Hu, J., Huang, L., Chen, M., Liao, H., Zhang, H., Wang, S., Zhang, Q., and Ying, Q.:  
316 Premature Mortality Attributable to Particulate Matter in China: Source  
317 Contributions and Responses to Reductions, *Environ. Sci. Technol.*, 51, 9950-  
318 9959, 10.1021/acs.est.7b03193, 2017.

319 Hu, R., Wang, S., Zheng, H., Zhao, B., Liang, C., Chang, X., Jiang, Y., Yin, R., Jiang,  
320 J., and Hao, J.: Variations and Sources of Organic Aerosol in Winter Beijing under  
321 Markedly Reduced Anthropogenic Activities During COVID-2019, *Environ. Sci.*  
322 *Technol.*, 10.1021/acs.est.1c05125, 2021.

323 Huang, L., Zhu, Y., Zhai, H., Xue, S., Zhu, T., Shao, Y., Liu, Z., Emery, C., Yarwood,  
324 G., Wang, Y., Fu, J., Zhang, K., and Li, L.: Recommendations on benchmarks for  
325 numerical air quality model applications in China – Part 1: PM<sub>2.5</sub> and chemical  
326 species, *Atmospheric Chemistry and Physics*, 21, 2725-2743, 10.5194/acp-21-  
327 2725-2021, 2021.

328 Huang, R. J., Zhang, Y., Bozzetti, C., Ho, K. F., Cao, J. J., Han, Y., Daellenbach, K. R.,  
329 Slowik, J. G., Platt, S. M., Canonaco, F., Zotter, P., Wolf, R., Pieber, S. M., Bruns,  
330 E. A., Crippa, M., Ciarelli, G., Piazzalunga, A., Schwikowski, M., Abbaszade, G.,  
331 Schnelle-Kreis, J., Zimmermann, R., An, Z., Szidat, S., Baltensperger, U., El  
332 Haddad, I., and Prevot, A. S.: High secondary aerosol contribution to particulate  
333 pollution during haze events in China, *Nature*, 514, 218-222, 10.1038/nature13774,  
334 2014.

335 Huang, X., Ding, A., Gao, J., Zheng, B., Zhou, D., Qi, X., Tang, R., Wang, J., Ren, C.,  
336 Nie, W., Chi, X., Xu, Z., Chen, L., Li, Y., Che, F., Pang, N., Wang, H., Tong, D.,  
337 Qin, W., Cheng, W., Liu, W., Fu, Q., Liu, B., Chai, F., Davis, S. J., Zhang, Q., and  
338 He, K.: Enhanced secondary pollution offset reduction of primary emissions  
339 during COVID-19 lockdown in China, *Nat. Sci. Rev.*, 10.1093/nsr/nwaa137, 2020.

340 IPCC: Climate Change 2013: The Physical Science Basis, Cambridge University Press,  
341 United Kingdom and New York, NY, USA, 2013.

342 Khan, M. F., Latif, M. T., Saw, W. H., Amil, N., Nadzir, M. S. M., Sahani, M., Tahir, N.

343 M., and Chung, J. X.: Fine particulate matter in the tropical environment:  
344 monsoonal effects, source apportionment, and health risk assessment, *Atmos.*  
345 *Chem. Phys.*, 16, 597-617, 10.5194/acp-16-597-2016, 2016.

346 Le, T., Wang, Y., Liu, L., Yang, J., Yung, Y. L., Li, G., and Seinfeld, J. H.: Unexpected  
347 air pollution with marked emission reductions during the COVID-19 outbreak in  
348 China, *Science*, eabb7431, 10.1126/science.abb7431, 2020.

349 Leng, C., Cheng, T., Chen, J., Zhang, R., Tao, J., Huang, G., Zha, S., Zhang, M., Fang,  
350 W., Li, X., and Li, L.: Measurements of surface cloud condensation nuclei and  
351 aerosol activity in downtown Shanghai, *Atmos. Environ.*, 69, 354-361,  
352 10.1016/j.atmosenv.2012.12.021, 2013.

353 Liu, B., Li, T., Yang, J., Wu, J., Wang, J., Gao, J., Bi, X., Feng, Y., Zhang, Y., and Yang,  
354 H.: Source apportionment and a novel approach of estimating regional  
355 contributions to ambient PM<sub>2.5</sub> in Haikou, China, *Environ. Pollut.*, 223, 334-345,  
356 10.1016/j.envpol.2017.01.030, 2017.

357 Liu, W., Xu, Y., Liu, W., Liu, Q., Yu, S., Liu, Y., Wang, X., and Tao, S.: Oxidative  
358 potential of ambient PM<sub>2.5</sub> in the coastal cities of the Bohai Sea, northern China:  
359 Seasonal variation and source apportionment, *Environ. Pollut.*, 236, 514-528,  
360 10.1016/j.envpol.2018.01.116, 2018a.

361 Liu, Z., Gao, W., Yu, Y., Hu, B., Xin, J., Sun, Y., Wang, L., Wang, G., Bi, X., Zhang, G.,  
362 Xu, H., Cong, Z., He, J., Xu, J., and Wang, Y.: Characteristics of PM<sub>2.5</sub> mass  
363 concentrations and chemical species in urban and background areas of China:  
364 emerging results from the CARE-China network, *Atmos. Chem. Phys.*, 18, 8849-  
365 8871, 10.5194/acp-18-8849-2018, 2018b.

366 Maji, K. J., Ye, W. F., Arora, M., and Shiva Nagendra, S. M.: PM<sub>2.5</sub>-related health and  
367 economic loss assessment for 338 Chinese cities, *Environ. Int.*, 121, 392-403,  
368 10.1016/j.envint.2018.09.024, 2018.

369 Mao, Y.-H., Liao, H., and Chen, H.-S.: Impacts of East Asian summer and winter

370 monsoons on interannual variations of mass concentrations and direct radiative  
371 forcing of black carbon over eastern China, *Atmos. Chem. Phys.*, 17, 4799-4816,  
372 10.5194/acp-17-4799-2017, 2017.

373 Ming, L., Jin, L., Li, J., Fu, P., Yang, W., Liu, D., Zhang, G., Wang, Z., and Li, X.: PM<sub>2.5</sub>  
374 in the Yangtze River Delta, China: Chemical compositions, seasonal variations,  
375 and regional pollution events, *Environ. Pollut.*, 223, 200-212,  
376 10.1016/j.envpol.2017.01.013, 2017.

377 Quan, J., Liu, Q., Li, X., Gao, Y., Jia, X., Sheng, J., and Liu, Y.: Effect of heterogeneous  
378 aqueous reactions on the secondary formation of inorganic aerosols during haze  
379 events, *Atmos. Environ.*, 122, 306-312, 10.1016/j.atmosenv.2015.09.068, 2015.

380 Tang, X., Chen, X., and Tian, Y.: Chemical composition and source apportionment of  
381 PM<sub>2.5</sub> – A case study from one year continuous sampling in the Chang-Zhu-Tan  
382 urban agglomeration, *Atmos. Pollut. Res.*, 8, 885-899, 10.1016/j.apr.2017.02.004,  
383 2017.

384 Tao, J., Zhang, L., Cao, J., Zhong, L., Chen, D., Yang, Y., Chen, D., Chen, L., Zhang,  
385 Z., Wu, Y., Xia, Y., Ye, S., and Zhang, R.: Source apportionment of PM<sub>2.5</sub> at urban  
386 and suburban areas of the Pearl River Delta region, south China - With emphasis  
387 on ship emissions, *Sci. Total Environ.*, 574, 1559-1570,  
388 10.1016/j.scitotenv.2016.08.175, 2017.

389 von Schneidemesser, E., Monks, P. S., Allan, J. D., Bruhwiler, L., Forster, P., Fowler,  
390 D., Lauer, A., Morgan, W. T., Paasonen, P., Righi, M., Sindelarova, K., and Sutton,  
391 M. A.: Chemistry and the Linkages between Air Quality and Climate Change,  
392 *Chem. Rev.*, 115, 3856-3897, 10.1021/acs.chemrev.5b00089, 2015.

393 Wang, H., Tian, M., Chen, Y., Shi, G., Liu, Y., Yang, F., Zhang, L., Deng, L., Yu, J.,  
394 Peng, C., and Cao, X.: Seasonal characteristics, formation mechanisms and source  
395 origins of PM<sub>2.5</sub> in two megacities in Sichuan Basin, China, *Atmos. Chem. Phys.*,  
396 18, 865-881, 10.5194/acp-18-865-2018, 2018.

397 Wang, Y., Chen, J., Wang, Q., Qin, Q., Ye, J., Han, Y., Li, L., Zhen, W., Zhi, Q., Zhang,  
398 Y., and Cao, J.: Increased secondary aerosol contribution and possible processing  
399 on polluted winter days in China, *Environ. Int.*, 127, 78-84,  
400 10.1016/j.envint.2019.03.021, 2019.

401 Xu, H., Xiao, Z., Chen, K., Tang, M., Zheng, N., Li, P., Yang, N., Yang, W., and Deng,  
402 X.: Spatial and temporal distribution, chemical characteristics, and sources of  
403 ambient particulate matter in the Beijing-Tianjin-Hebei region, *Sci. Total Environ.*,  
404 658, 280-293, 10.1016/j.scitotenv.2018.12.164, 2019.

405 Yang, S., Liu, Z., Li, J., Zhao, S., Xu, Z., Gao, W., Hu, B., and Wang, Y.: Insights into  
406 the chemistry of aerosol growth in Beijing: Implication of fine particle episode  
407 formation during wintertime, *Chemosphere*, 274, 129776,  
408 10.1016/j.chemosphere.2021.129776, 2021.

409 Yu, S., Liu, W., Xu, Y., Yi, K., Zhou, M., Tao, S., and Liu, W.: Characteristics and  
410 oxidative potential of atmospheric PM<sub>2.5</sub> in Beijing: Source apportionment and  
411 seasonal variation, *Sci. Total Environ.*, 650, 277-287,  
412 10.1016/j.scitotenv.2018.09.021, 2019.

413 Zhang, Y., Lang, J., Cheng, S., Li, S., Zhou, Y., Chen, D., Zhang, H., and Wang, H.:  
414 Chemical composition and sources of PM<sub>1</sub> and PM<sub>2.5</sub> in Beijing in autumn, *Sci.*  
415 *Total Environ.*, 630, 72-82, 10.1016/j.scitotenv.2018.02.151, 2018.

416 Zhang, Y., Zhang, X., Zhong, J., Sun, J., Shen, X., Zhang, Z., Xu, W., Wang, Y., Liang,  
417 L., Liu, Y., Hu, X., He, M., Pang, Y., Zhao, H., Ren, S., and Shi, Z.: On the fossil  
418 and non-fossil fuel sources of carbonaceous aerosol with radiocarbon and AMS-  
419 PMF methods during winter hazy days in a rural area of North China plain,  
420 *Environ. Res.*, 208, 112672, 10.1016/j.envres.2021.112672, 2022.

421 Zhu, Y., Huang, L., Li, J., Ying, Q., Zhang, H., Liu, X., Liao, H., Li, N., Liu, Z., Mao,  
422 Y., Fang, H., and Hu, J.: Sources of particulate matter in China: Insights from  
423 source apportionment studies published in 1987-2017, *Environ. Int.*, 115, 343-357,  
424 10.1016/j.envint.2018.03.037, 2018.
